# Supplementary material for: The cost–effectiveness of pegcetacoplan in complement treatment-naïve adults with paroxysmal nocturnal hemoglobinuria in the USA
Source: Atypon-hosted journal article supplement (doi:10.57264/cer-2023-0055), 2023-09-01
Supplement: supplementary materials.docx [file supplementary%20materials.docx]

Supplementary Materials

Scenario analyses based on hemoglobin stabilization as model outcome

Supplemental Table 1. Odds ratios between transfusion-avoidant and transfusion-required populations hemoglobin stabilization, pooled arms

| **From** | **Transfusion required, %** | **Transfusion avoidant, %** | **Odds ratios (transfusion avoidant vs required)** |
| --- | --- | --- | --- |
| **To (a**t **26 weeks)** |
| **Transfusion Avoidant** | 62.86 | 78.57 | 2.17 |
| **Transfusion Required** | 37.14 | 21.43 | 0.46 |

Supplemental Table 2. Probabilities for transfusion avoidant group – hemoglobin stabilization

| **Probabilities after 26 weeks** | | **Transfusion avoidant, %** | |
| --- | --- | --- | --- |
| **Transfusion avoidant** | **Hemoglobin stabilized** | 95.97 | 91.61 |
| **Hemoglobin not stabilized** | 4.36 |
| **Transfusion required** |  | 4.03 | 4.03 |

Supplemental Table 3. Transition probabilities, comparators – hemoglobin stabilization

| **From** | **To** | | |
| --- | --- | --- | --- |
| **Hb stabilized,** % | **Hb not stabilized, %** | **Transfusion required,%** |
| **Eculizumab** | | | |
| **Hb stabilized** | 66.97 | 19.09 | 13.94 |
| **Hb not stabilized** | 58.60 | 15.38 | 26.02 |
| **Transfusion required** | 51.72 | 12.65 | 35.63 |
| **Ravulizumab** | | | |
| **Hb stabilized** | 62.77 | 23.49 | 13.74 |
| **Hb not stabilized** | 54.06 | 20.23 | 25.71 |
| **Transfusion required** | 47.11 | 17.63 | 35.26 |

**Supplemental Figure 1.** Transfusion Required health state structure


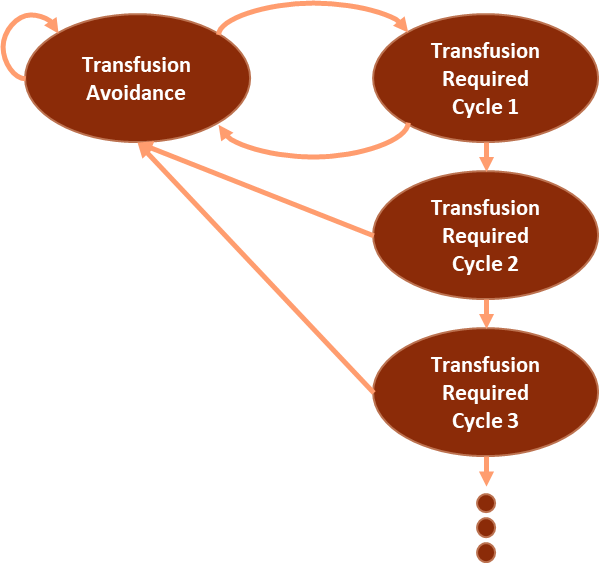


**Supplemental Figure 2.** Methodology of calculating transition probabilities for pegcetacoplan+BSC for (A) base-case model structure based on Hb normalization and (B) alternative model structure based on Hb stabilization

**A) Hb normalization**


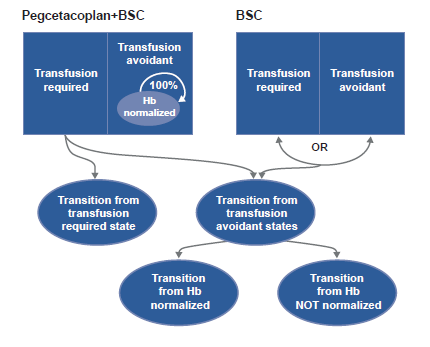


**A) Hb stabilization**


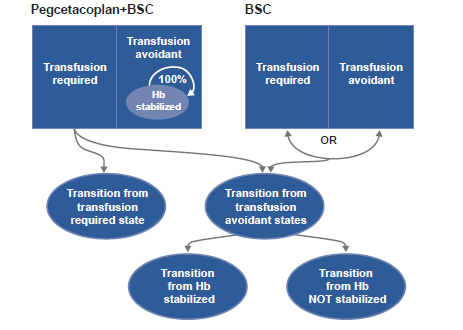


BSC: best supportive care, Hb: hemoglobin.

Supplemental Figure 3. Tornado diagrams of deterministic sensitivity analysis for pegcetacoplan versus (A) eculizumab and (B) ravulizumab

1. Pegcetacoplan vs eculizumab
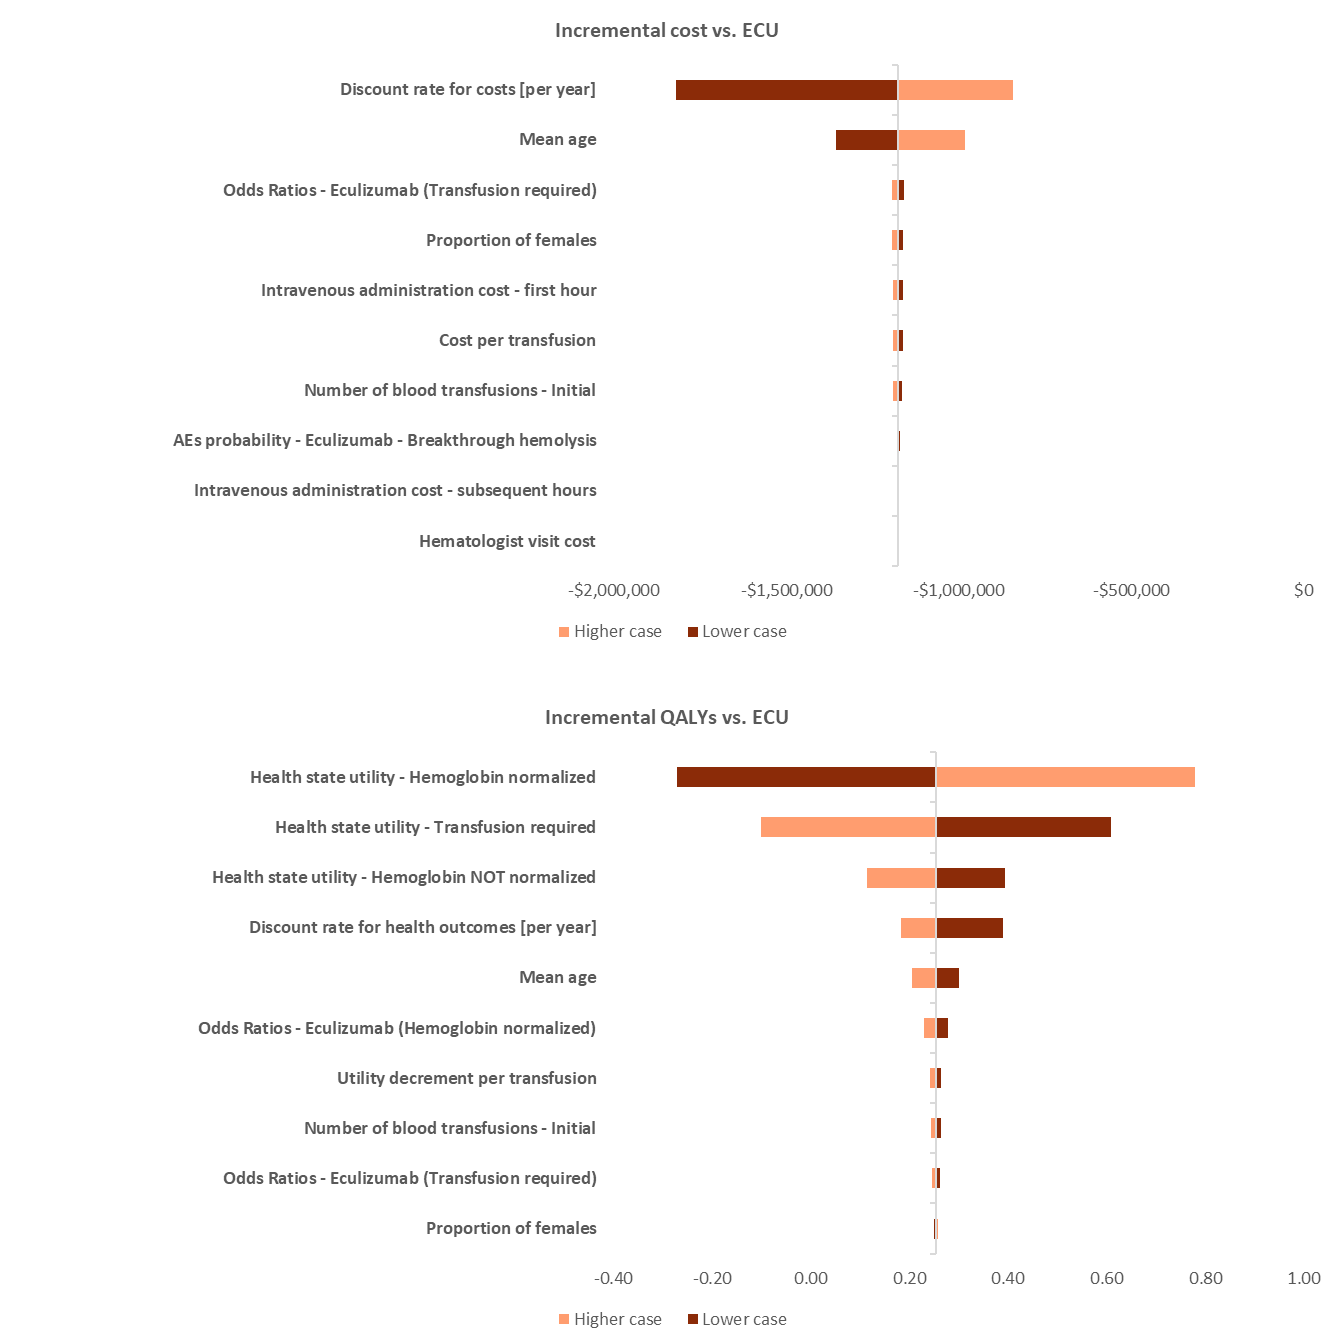


**Incremental QALYs**

**Incremental costs**

B) Pegcetacoplan versus ravulizumab

**Incremental costs**


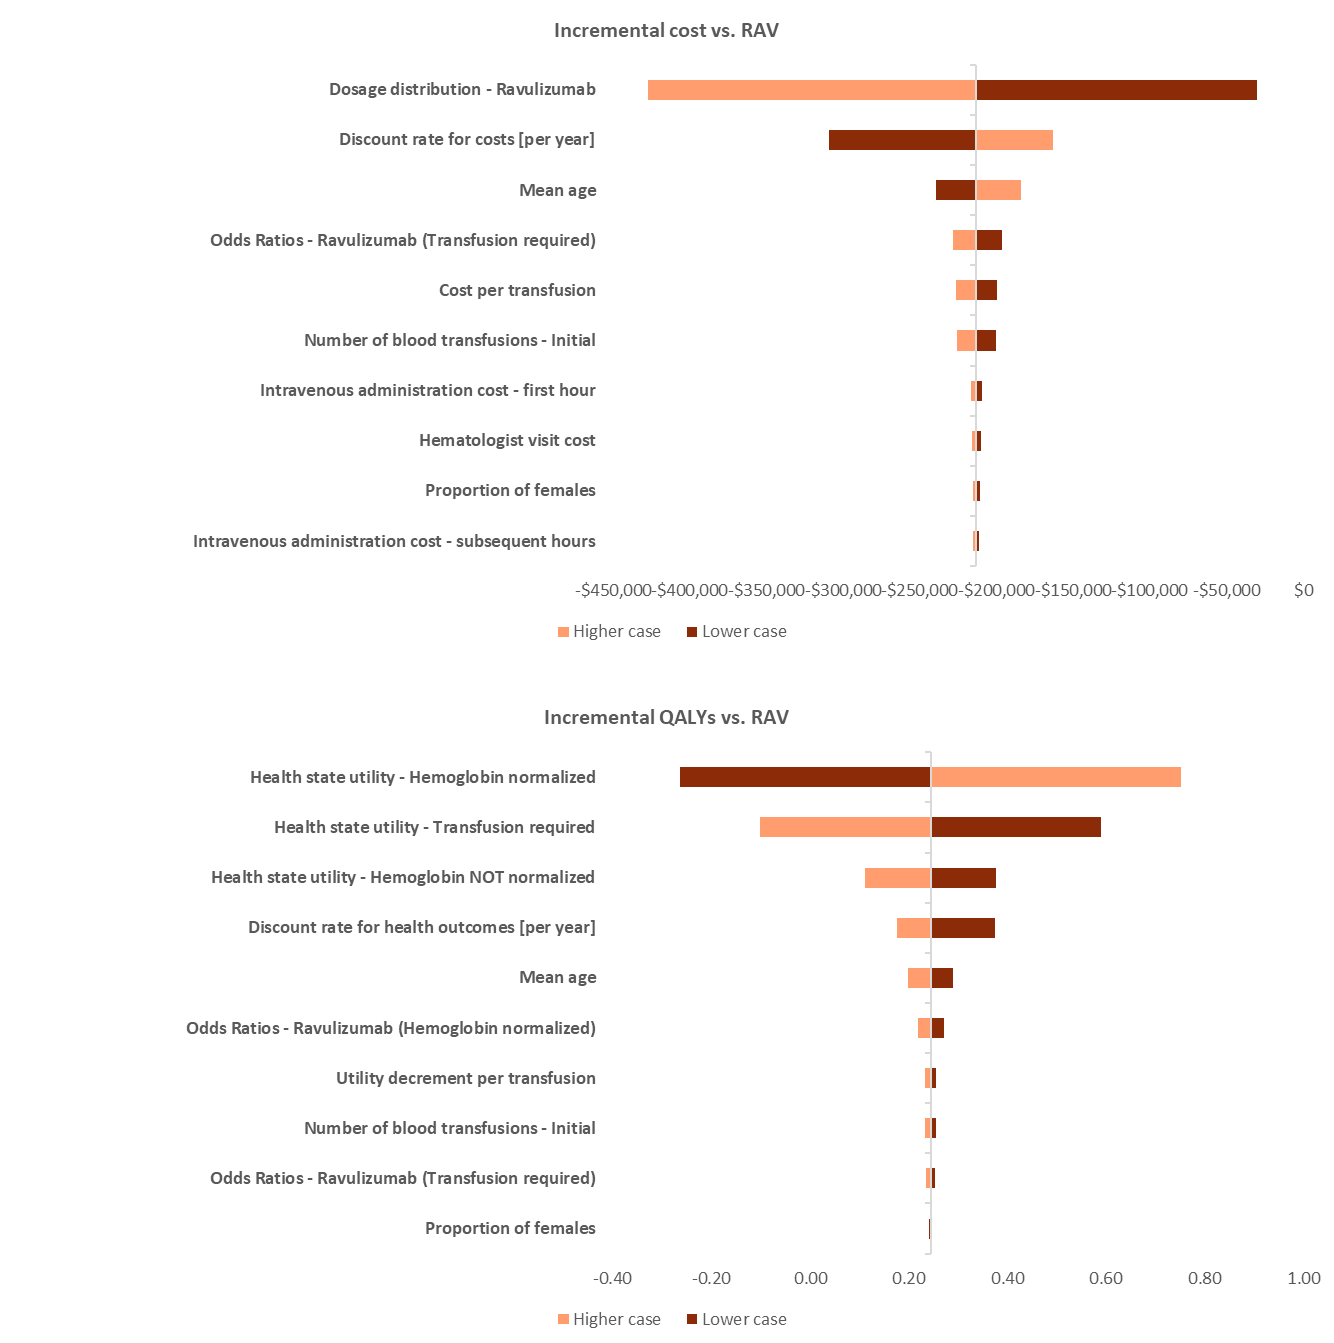


**Incremental QALYs**

AE: adverse event; QALY: quality-adjusted life year.

Supplemental Figure 4. Incremental cost-effectiveness planes: (A) pegcetacoplan versus eculizumab, (B) pegcetacoplan versus ravulizumab – based on hemoglobin stabilization

A) Pegcetacoplan versus eculizumab


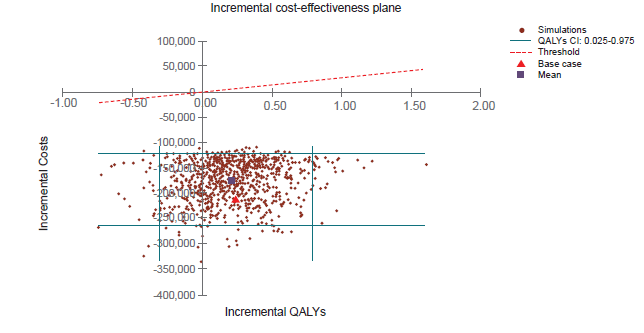

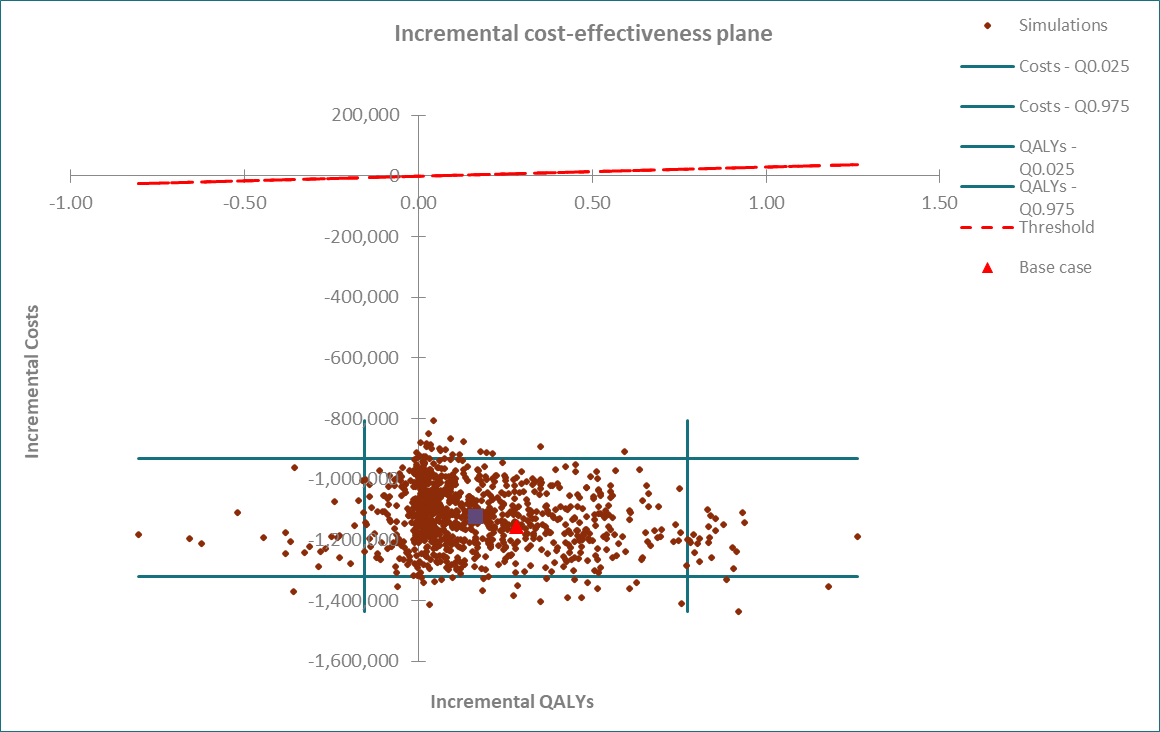


B) Pegcetacoplan versus ravulizumab


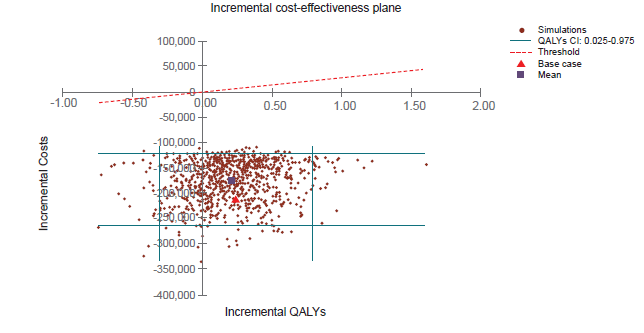

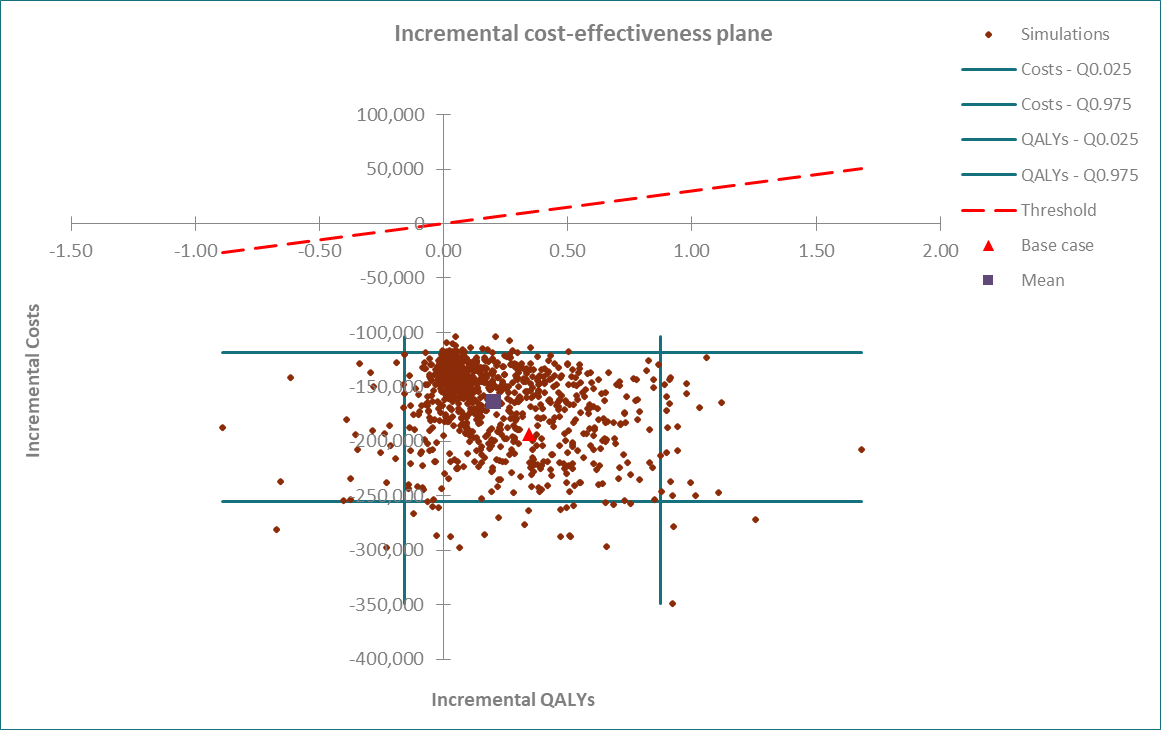


QALY: quality-adjusted life year.


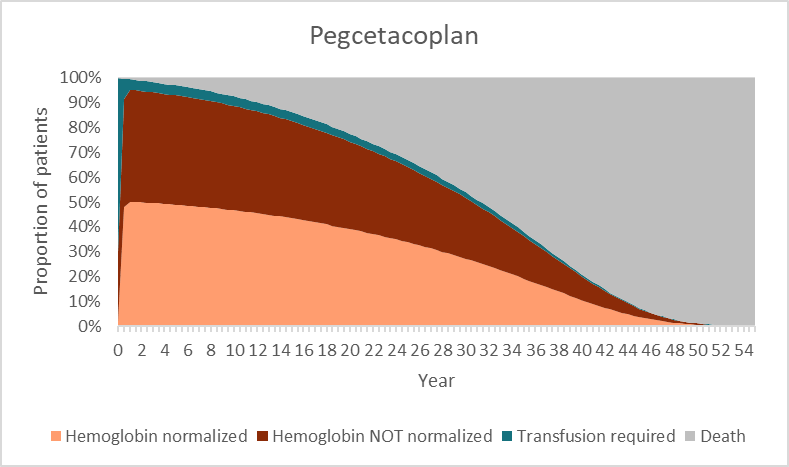
**Supplemental Figure 5. Distribution of patients over time simulated by the CEM for pegcetacoplan, eculizumab, and ravulizumab**

**
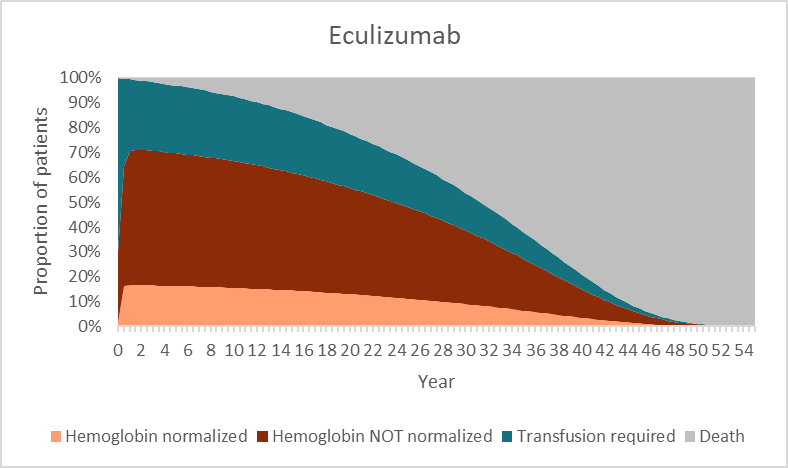
**

**
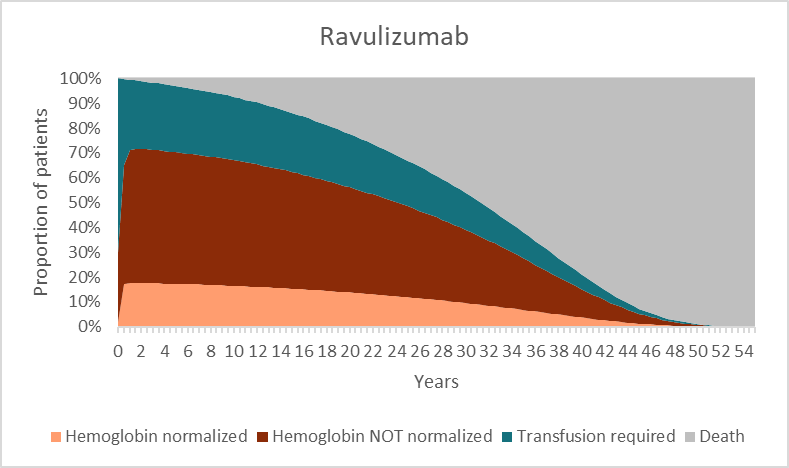
**
